# Supplementary material for: Liver Transplantation in Patients with Portal Vein Thrombosis: Revisiting Outcomes According to Surgical Techniques
Source: MDPI journal article supplement (doi:10.3390/jcm12072457), 2023-03-23
Supplement: s1 [file s1]

Supplementary Table S1. Comparison of the main post-operative outcomes between the two groups of portal reconstruction (TTA versus Bypass)

|                                    | Overall (165) | TTA (123) | Bypass (42) | p-value |
|------------------------------------|---------------|-----------|-------------|---------|
| 90 – day mortality; n(%)           | 21 (12.7)     | 12 (9.8)  | 9 (21.4)    | 0.050   |
| 1 – year mortality; n(%)           | 28 (17.0)     | 17 (13.8) | 11 (26.2)   | 0.065   |
| Overall mortality; n(%)            | 48 (29.1)     | 36 (29.3) | 12 (28.6)   | 0.93    |
| 90 - day graft loss; n(%)          | 23 (13.9)     | 14 (11.4) | 9 (21.4)    | 0.10    |
| 1 year graft loss; n(%)            | 30 (18.2)     | 19 (15.4) | 11 (26.2)   | 0.12    |
| Overall graft loss; n(%)           | 49 (29.7)     | 37 (30.1) | 12 (28.6)   | 0.85    |
| Post-LT portal thrombosis; n(%)    | 16 (9.7)      | 14 (11.4) | 2 (4.8)     | 0.36    |
| PNF; n(%)                          | 6 (3.6)       | 3 (2.4)   | 3 (7.1)     | 0.17    |
| Severe post-LT complications; n(%) | 87 (52.7)     | 63 (51.2) | 24 (57.1)   | 0.51    |
| Retransplantation; n(%)            | 8 (4.8)       | 6 (4.9)   | 2 (4.8)     | 1       |

LT: liver transplantation; PNF: primary graft non function
